# Supplementary material for: Potential Regulation of Iron Metabolism Gene Expression by DOF Transcription Factors in <em>Dendrocalamus latiflorus</em>
Source: Preprints.org preprint supplement (doi:10.20944/preprints202407.0826.v1), 2024-07-10
Supplement: Supplementary file 1 [file supplementary]

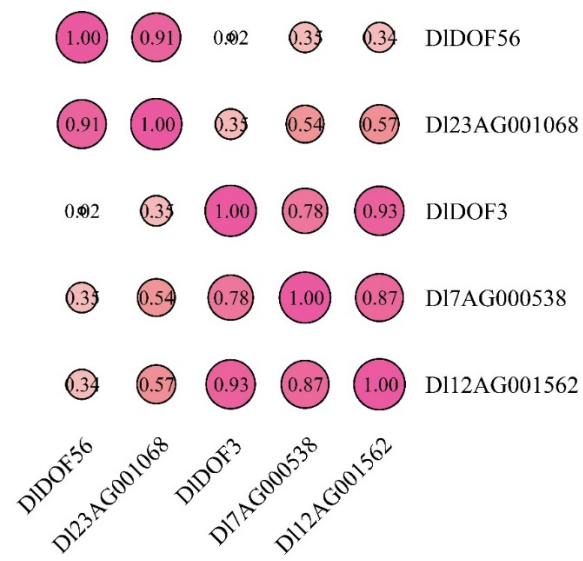

**Figure S1.** The relative expression correlation of two DIDOFs and three IMR genes in leaves.

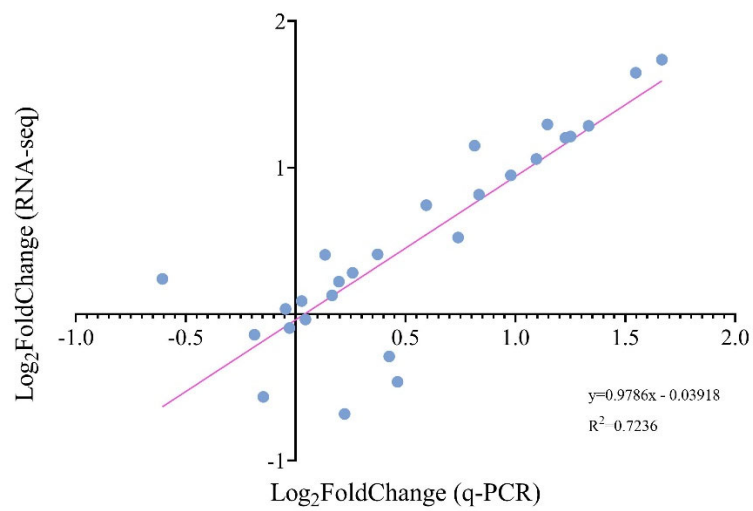

**Figure S2.** The linear regression between transcriptome data and q-PCR data.
